# Supplementary material for: Electrodeposited CoNi-LDH nanosheets supported on halloysite nanotubes as a robust and highly efficient electrocatalyst for water oxidation
Source: Royal Society of Chemistry journal article supplement (doi:10.1039/d3nj05370a), 2024-01-01
Supplement: d3nj05370a1.pdf [file d3nj05370a1.pdf]

## Electrodeposited CoNi-LDH Nanosheets Supported on Halloysite Nanotubes as a Robust and Highly Efficient Electrocatalyst for Water Oxidation

M. Hajilo<sup>a</sup>, D. Taherinia<sup>a\*</sup>

<sup>a</sup> Department of Chemistry, Sharif University of Technology, Tehran 11155-9516, Iran

\*taherinia@sharif.edu

### Table of Contents

|                                                                                                 |   |
|-------------------------------------------------------------------------------------------------|---|
| <b>Figure S1.</b> XRD patterns of CoNi/H-1 to 3 .....                                           | 2 |
| <b>Figure S2.</b> The zoomed-in LSV curves of Figure 4a .....                                   | 3 |
| <b>Figure S3.</b> CV curves of HNTs, CoNi-LDH, and CoNi/H-1 to 4 in the nonfaradaic region..... | 3 |
| <b>Figure S4.</b> ECSA-normalized LSV curves .....                                              | 4 |
| <b>Figure S5.</b> Post-electrolysis FESEM analysis of CoNi/H-2 .....                            | 5 |

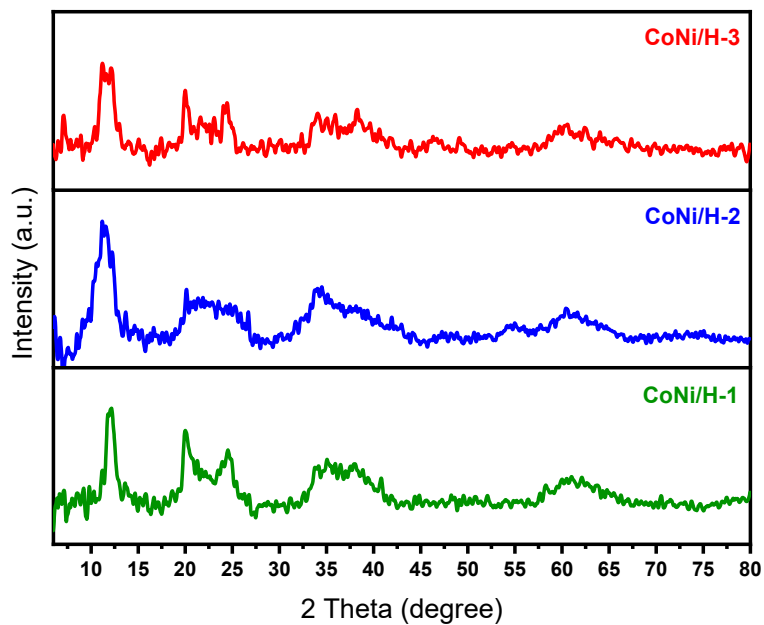

Figure S1. XRD patterns of the as-synthesized CoNi/H-1 to 3.

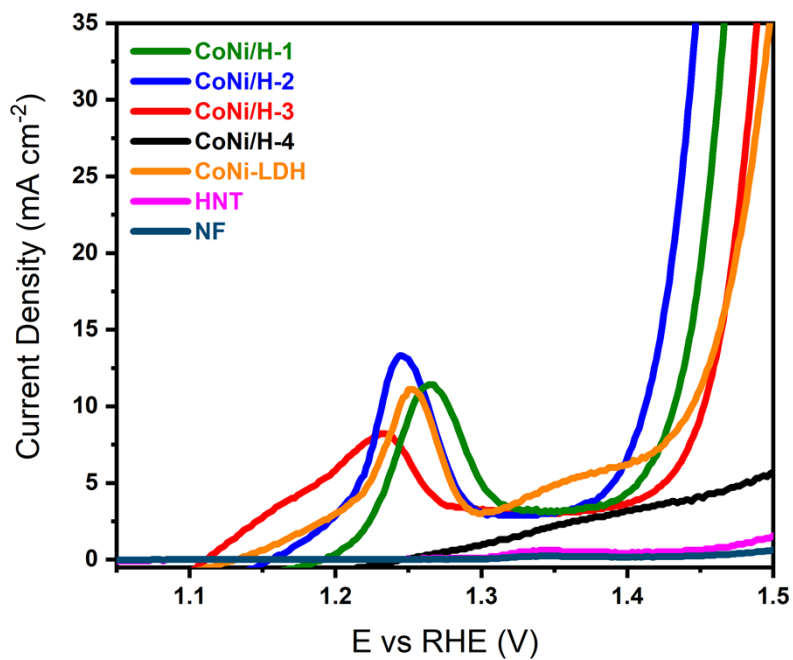

Figure S2. The zoomed-in LSV curves of Figure 4a.

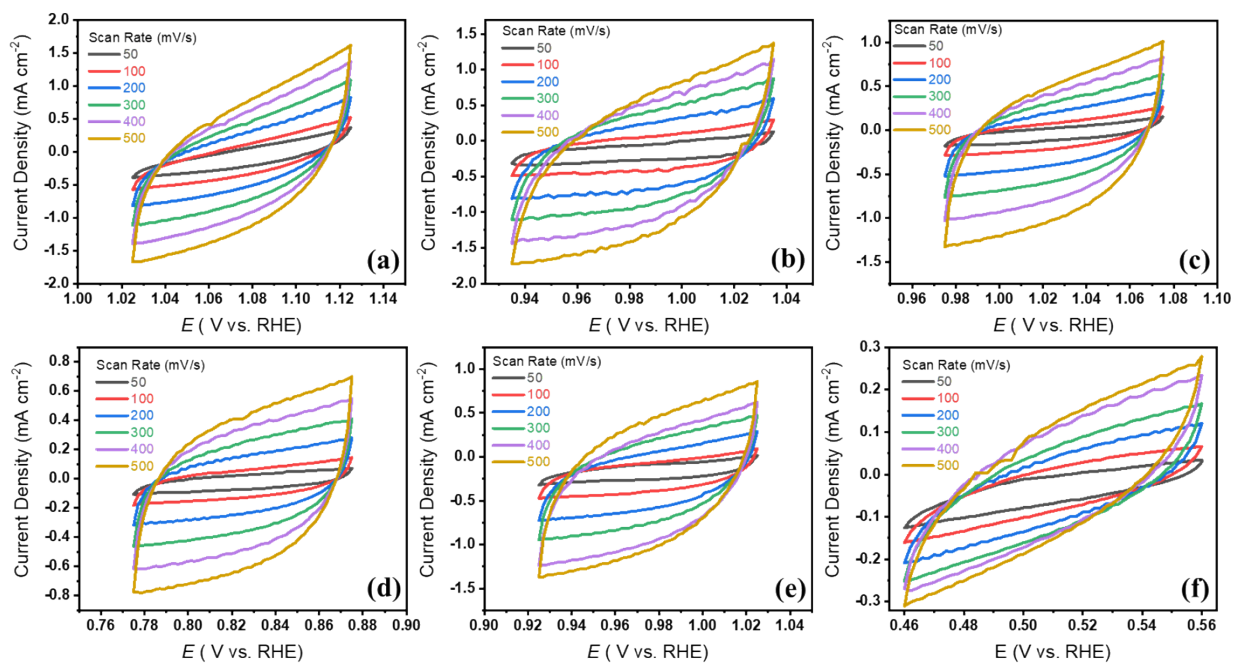

**Figure S3.** CV curves of (a-d) CoNi/H-1 to 4 (e) CoNi-LDH, and (f) HNTs obtained in the nonfaradaic potential window at different scan rates in 1.0 M KOH.

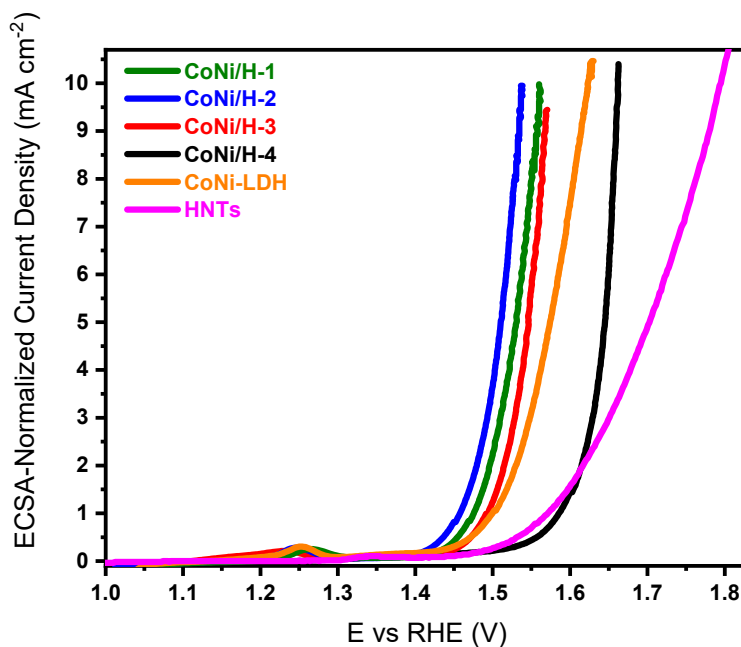

**Figure S4.** ECSA-normalized LSV curves of CoNi/H-1 to 4, CoNi-LDH, and HNTs.

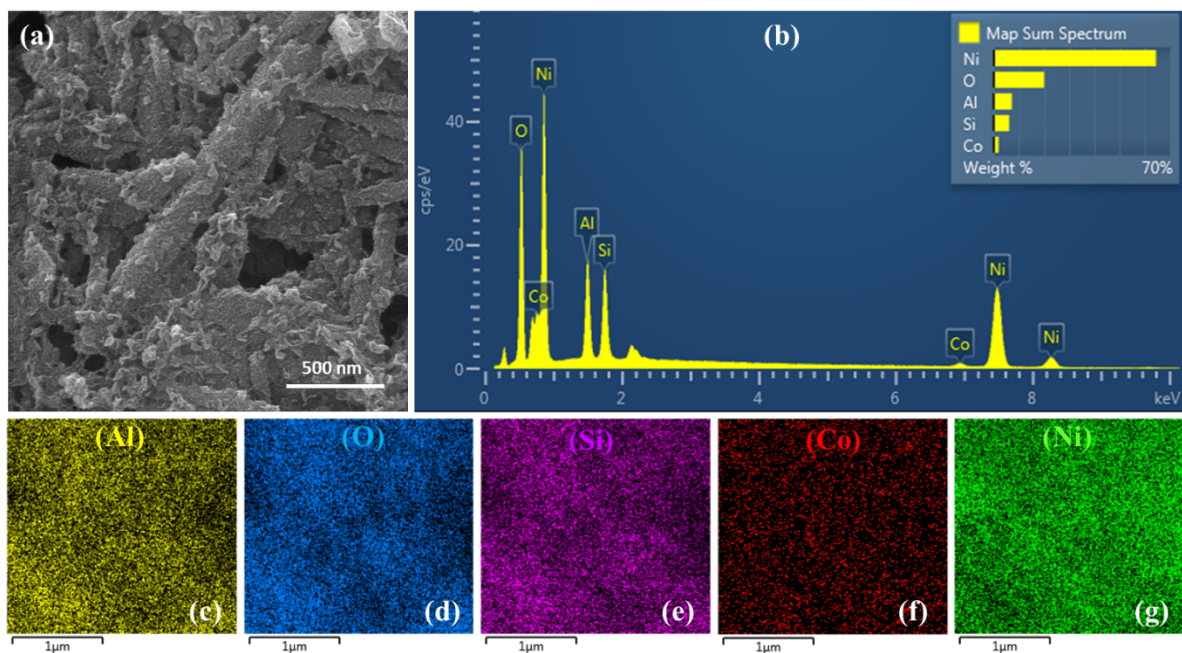

**Figure S5.** (a) FESEM image, (b) EDX spectrum, and (c-g) elemental mapping images of CoNi/H-2 after 24 h of electrolysis in 1.0 M KOH solution at the constant potential of 1.46 V (vs. RHE).
